# Supplementary material for: SPTBN1 Mediates the Cytoplasmic Constraint of PTTG1, Impairing Its Oncogenic Activity in Human Seminoma
Source: MDPI journal article supplement (doi:10.3390/ijms242316891), 2023-11-29
Supplement: s1 [file s1]

Table S1. List of triptic unique peptide related to the protein Spectrin alpha chain OS=Homo sapiens; Uniprot code Q13813

| Sequence                 | Modifications            | Master Protein Accessions | Theo. MH+ [Da] |
|--------------------------|--------------------------|---------------------------|----------------|
| QGFVPAAYVK               |                          | Q13813                    | 1079,588       |
| LLEATELK                 |                          | Q13813                    | 916,535        |
| LFGAAEVQR                |                          | Q13813                    | 990,5367       |
| LIQSHPESAEDLQEK          |                          | Q13813                    | 1723,85        |
| ITALDEFATK               |                          | Q13813                    | 1108,588       |
| LSDDNTIGKEEIQR           |                          | Q13813                    | 1745,866       |
| LQTASDESYKDPTNIQSK       |                          | Q13813                    | 2024,977       |
| VLETAEDIQER              |                          | Q13813                    | 1302,654       |
| YEALKEPMVAR              | 1xOxidation [M8]         | Q13813                    | 1322,677       |
| WSQLLANSAAR              |                          | Q13813                    | 1216,643       |
| TATDEAYKDPSNLQGK         |                          | Q13813                    | 1737,829       |
| SQLLGSAAHEVQR            |                          | Q13813                    | 1324,697       |
| SLSAQEEKITALDEFATK       |                          | Q13813                    | 1981,012       |
| SLQQLAEER                |                          | Q13813                    | 1073,559       |
| SSEEIESAFR               |                          | Q13813                    | 1154,532       |
| EKEPIVGSTDYKGKDEDSAEALLK |                          | Q13813                    | 2494,22        |
| EKEPIAASTNR              | 1xGlu->pyro-Glu [N-Term] | Q13813                    | 1197,622       |
| EAFLNTEKGDSDLDSVEALIK    |                          | Q13813                    | 2294,14        |
| DVTGAEALLER              |                          | Q13813                    | 1173,611       |
| DVDEIEAWISEK             |                          | Q13813                    | 1433,679       |
| DLTGVQNLR                |                          | Q13813                    | 1015,553       |
| ETENVKSSEEIESAFR         |                          | Q13813                    | 1854,872       |
| ELPTAFDYVEFTR            |                          | Q13813                    | 1587,769       |
| DLASVQALLR               |                          | Q13813                    | 1085,631       |
| DLAALGDKVNSLGETAER       |                          | Q13813                    | 1858,951       |
| GRELPTAFDYVEFTR          |                          | Q13813                    | 1800,892       |
| HQAFEAEELSANQSR          |                          | Q13813                    | 1587,751       |
| HQAFEAEELHANADR          |                          | Q13813                    | 1608,751       |
| KFDDDFQK                 |                          | Q13813                    | 927,4571       |
| KFDDDFQKDLK              |                          | Q13813                    | 1283,663       |
| FQFFQR                   |                          | Q13813                    | 872,4414       |
| FLADFR                   |                          | Q13813                    | 768,4039       |
| FKELSTLRR                |                          | Q13813                    | 1149,674       |
| GKDLIGVQNLLK             |                          | Q13813                    | 1297,784       |
| GLVSSDELAK               |                          | Q13813                    | 1018,542       |
| LIDVNHYAKDEVAAR          |                          | Q13813                    | 1713,892       |
| GNAMVEEGHFAAEDVK         | 1xOxidation [M4]         | Q13813                    | 1719,764       |
| GLVSSDELAKDVTGAEALLER    |                          | Q13813                    | 2173,135       |
| FLSDFR                   |                          | Q13813                    | 784,3988       |
| QKLEDSYR                 | 1xGln->pyro-Glu [N-Term] | Q13813                    | 1021,495       |
| LQIASDENYKDPTNLQGK       |                          | Q13813                    | 2034,014       |

Table S2. List of triptic unique peptide related to the protein Spectrin beta chain OS=Homo sapiens; Uniprot code Q01082

| Sequence             | Modifications                               | Master Protein Accessions | Theo. MH+ [Da] |
|----------------------|---------------------------------------------|---------------------------|----------------|
| LLEVLSEGERLPKPTK     |                                             | Q01082                    | 1680,005       |
| LYAGLKDLAEER         |                                             | Q01082                    | 1377,737       |
| QALQDTLALYK          |                                             | Q01082                    | 1263,694       |
| IVSSSDVGHDEYSTQSLVK  |                                             | Q01082                    | 2050,993       |
| LVSDGNINSDR          |                                             | Q01082                    | 1189,581       |
| LLDPEDISVDHPDEK      |                                             | Q01082                    | 1721,823       |
| LFQLNR               |                                             | Q01082                    | 790,457        |
| ILSSDDYGKDLTSVMR     | 1xOxidation [M15]                           | Q01082                    | 1815,879       |
| LTTLELLEVR           |                                             | Q01082                    | 1342,805       |
| LTTLELLEVR           |                                             | Q01082                    | 1186,704       |
| ITDLYTDLRDGR         |                                             | Q01082                    | 1437,733       |
| LQAAYAGDKADDIQKR     |                                             | Q01082                    | 1762,908       |
| INAVVETGR            |                                             | Q01082                    | 958,5316       |
| QLWGLLIEETEK         | 1xGln->pyro-Glu [N-Term]                    | Q01082                    | 1597,858       |
| YKEVAELTR            |                                             | Q01082                    | 1108,6         |
| VQAVVAVAR            |                                             | Q01082                    | 912,5625       |
| SLLDACESR            | 1xCarbamidomethyl [C6]                      | Q01082                    | 1050,488       |
| SLLDACESRR           | 1xCarbamidomethyl [C6]                      | Q01082                    | 1206,59        |
| TALPAQSAATLPAR       |                                             | Q01082                    | 1367,764       |
| TAGYPNVNIHNFTTSWR    |                                             | Q01082                    | 1977,957       |
| TAASGIPYHSEVPVSLK    |                                             | Q01082                    | 1755,928       |
| SQNIVTDSSSLSAEAIR    |                                             | Q01082                    | 1777,893       |
| ELEAENYHDIKR         | 1xGlu->pyro-Glu [N-Term]                    | Q01082                    | 1498,728       |
| EAEKLESEHPDQAQAILSR  |                                             | Q01082                    | 2151,068       |
| DQNTVETLQR           |                                             | Q01082                    | 1203,596       |
| DLVAIEAK             |                                             | Q01082                    | 858,4931       |
| FATDGEQYKPCDPQVIR    | 1xCarbamidomethyl [C11]                     | Q01082                    | 1952,917       |
| ETWLSNQ              |                                             | Q01082                    | 1162,549       |
| EQWANLEQLSAIR        |                                             | Q01082                    | 1557,802       |
| EIGQSVDEVEK          |                                             | Q01082                    | 1232,6         |
| AQTLPTSVVTITSESSPGKR |                                             | Q01082                    | 2059,103       |
| FATDGEQYKPCDPQVIRDR  | 1xCarbamidomethyl [C11]                     | Q01082                    | 2224,045       |
| DALLWCQMK            | 1xCarbamidomethyl [C7];<br>1xOxidation [M9] | Q01082                    | 1293,633       |
| KHEAIETDIAAYEER      |                                             | Q01082                    | 1774,861       |
| FMELLEPLNER          | 1xOxidation [M2]                            | Q01082                    | 1406,698       |
| FFSMVR               | 1xOxidation [M4]                            | Q01082                    | 802,3916       |
| TQILAASYELHK         |                                             | Q01082                    | 1373,742       |
| KLPEELGRDQNTVETLQR   |                                             | Q01082                    | 2126,12        |
| LVSQDNFGFDLPAVEAATK  |                                             | Q01082                    | 2022,018       |
| HRPDLIDFDK           |                                             | Q01082                    | 1255,643       |
| ALVADSHPESE          |                                             | Q01082                    | 1310,634       |
| ELALRNELIR           |                                             | Q01082                    | 1226,722       |
| EVDDLEQWIAER         |                                             | Q01082                    | 1502,712       |
| DASVAEAWLLGQEPYLSR   |                                             | Q01082                    | 2092,035       |
| IQEKVDSIDDR          |                                             | Q01082                    | 1317,664       |
| MWEVLESTTQTK         |                                             | Q01082                    | 1452,704       |
